# Supplementary material for: Rhodium-catalyzed asymmetric hydrogenation of unprotected β-enamine phosphonates
Source: Royal Society of Chemistry journal article supplement (doi:10.1039/c6ob00540c), 2016-01-01
Supplement: c6ob00540c1.pdf [file c6ob00540c1.pdf]

*Supporting Information for*

## **Rhodium–Catalyzed Asymmetric Hydrogenation of Unprotected $\beta$ -Enamine Phosphonates**

*Ming Zhou, Zejian Xue, Min Cao, Xiu-Qin Dong,\* and Xumu Zhang\**

E-mail: xumu@whu.edu.cn, xiuqindong@whu.edu.cn

### **Content**

|                                                                     |    |
|---------------------------------------------------------------------|----|
| 1. General information.....                                         | 2  |
| 2. Typical procedure for the synthesis of compound <b>1</b> .....   | 2  |
| 3. General procedure for asymmetric hydrogenation of <b>1</b> ..... | 2  |
| 4. NMR Spectra .....                                                | 7  |
| 5. HPLC spectra.....                                                | 19 |

## I. General Information

Unless otherwise noted, all reagents and solvents were purchased from commercial suppliers and used without further purification.  $^1\text{H}$ ,  $^{13}\text{C}$  and  $^{31}\text{P}$  NMR spectra were recorded with a Bruker ADVANCE III (400 MHz) spectrometer with  $\text{CDCl}_3$  as the solvent and tetramethylsilane (TMS) as the internal standard. Chemical shifts are reported in parts per million (ppm,  $\delta$  scale) downfield from TMS at 0.00 ppm and referenced to the  $\text{CDCl}_3$  at 7.26 ppm (for  $^1\text{H}$  NMR) or 77.0 ppm (for  $^{13}\text{C}$  NMR). Data are reported as: multiplicity (s = singlet, d = doublet, t = triplet, q = quartet, m = multiplet), coupling constant in hertz (Hz) and signal area integration in natural numbers.  $^{13}\text{C}$  NMR and  $^{31}\text{P}$  NMR analyses were run with decoupling. Optical rotations  $[\alpha]_{\text{D}}$  were determined using a PERKIN ELMER polarimeter 343 instrument. HPLC analysis was conducted on an Agilent 1260 Series instrument. Column Chromatography was performed with silica gel Merck 60 (300-400 mesh).

## II. Typical procedure for the synthesis of compound 1

A 250 mL flask was charged with diethylmethylphosphonate (33 mmol, 5.02 g) in dry THF (90 mL). At  $-78\text{ }^\circ\text{C}$ , a 1.6 M n-BuLi/hexane-solution (36.3 mmol, 22.7 mL) was slowly added and the solution was stirred for 1 h. After addition of 1.0 equiv of benzonitrile (33 mmol, 3.41 g), stirring was continued for 15 min at this temperature and further 2 h at  $0\text{ }^\circ\text{C}$ . After quenching the reaction with water (25 mL), the mixture was evaporated on a rotavapor to remove the THF. The aqueous residue was extracted with dichloromethane ( $3 \times 30$  mL), the combined extracts were dried ( $\text{Na}_2\text{SO}_4$ ), and concentrated to yield **1a** as a pale yellow oil (88%). The physical data were identical in all respect to those previously reported.<sup>[1]</sup>

## III. General procedure for asymmetric hydrogenation of compound 1

A stock solution was made by mixing  $[\text{Rh}(\text{cod})_2]\text{BF}_4$  with ligand in a 1:1.1 molar ratio in TFE at room temperature for 30 min in a nitrogen-filled glovebox. An aliquot of the catalyst solution (0.1 mL, 0.001 mmol) was transferred by syringe into the vials charged with different substrates (0.1 mmol for each) in anhydrous TFE (0.9 mL). The vials were subsequently transferred into an autoclave into which hydrogen gas was charged. The reaction was then stirred under  $\text{H}_2$  (40 atm) at  $40\text{ }^\circ\text{C}$  for 20 h. The hydrogen gas was released carefully. The solution was

concentrated and passed through a short column of silica gel (eluant: EA) to remove the metal complex. The ee values of all compounds were determined by HPLC analysis of the corresponding benzamide.

#### Diethyl 2-amino-2-phenylethylphosphonate **1a**

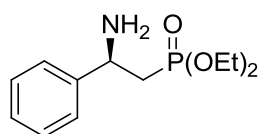

Colorless oil; 86% ee;  $[\alpha]_{\text{D}}^{20} = -2.9$  ( $c = 1$ ,  $\text{CH}_2\text{Cl}_2$ ); The enantiomeric excess was determined by HPLC analysis of the corresponding benzamide, Chiralpak OD-H column, hexane: isopropanol = 90:10; flow rate = 1.0 mL/min; UV detection at 210 nm;  $t_{\text{R}} = 11.1$  min (minor), 17.1 min (major).  $^1\text{H}$  NMR (400 MHz,  $\text{CDCl}_3$ )  $\delta = 7.39\text{--}7.28$  (m, 5H), 4.44–4.38 (m, 1H), 4.12–4.04 (m, 4H), 2.18–2.11 (m, 4H), 1.32–1.28 (m, 6H);  $^{13}\text{C}$  NMR (101 MHz,  $\text{CDCl}_3$ )  $\delta = 145.3$  (d,  $J = 26.3$  Hz), 128.7, 127.5, 126.2, 61.8 (t,  $J = 6.1$  Hz), 51.2 (d,  $J = 4.0$  Hz), 35.9 (d,  $J = 137.4$  Hz), 16.4 (d,  $J = 6.1$  Hz);  $^{31}\text{P}$  NMR (161.7 MHz,  $\text{CDCl}_3$ )  $\delta = 29.2$ . ESI-HRMS Calculated for  $\text{C}_{12}\text{H}_{21}\text{NO}_3\text{P}^+$  ( $[\text{M}+\text{H}]^+$ ): 258.1259, found 258.1254.

#### Diethyl 2-amino-2-p-tolyethylphosphonate **1b**

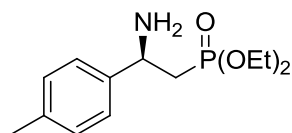

Colorless oil; 86% ee;  $[\alpha]_{\text{D}}^{20} = -0.4$  ( $c = 1$ ,  $\text{CH}_2\text{Cl}_2$ ); The enantiomeric excess was determined by HPLC analysis of the corresponding benzamide, Chiralpak OD-H column, hexane: isopropanol = 80:20; flow rate = 1.0 mL/min; UV detection at 210 nm;  $t_{\text{R}} = 5.4$  min (minor), 9.8 min (major).  $^1\text{H}$  NMR (400 MHz,  $\text{CDCl}_3$ )  $\delta = 7.28\text{--}7.26$  (m, 2H), 7.15 (d,  $J = 8.0$  Hz, 2H), 4.41–4.35 (m, 1H), 4.12–4.05 (m, 4H), 2.33 (s, 3H), 2.17–2.05 (m, 4H), 1.33–1.29 (m, 6H);  $^{13}\text{C}$  NMR (101 MHz,  $\text{CDCl}_3$ )  $\delta = 142.5$  (d,  $J = 16.2$  Hz), 137.1, 129.3, 126.0, 61.7 (t,  $J = 7.1$  Hz), 50.9 (d,  $J = 3.0$  Hz), 36.0 (d,  $J = 136.4$  Hz), 21.1, 16.5 (d,  $J = 6.1$  Hz);  $^{31}\text{P}$  NMR (161.7 MHz,  $\text{CDCl}_3$ )  $\delta = 29.4$ . ESI-HRMS Calculated for  $\text{C}_{13}\text{H}_{23}\text{NO}_3\text{P}^+$  ( $[\text{M}+\text{H}]^+$ ): 272.1416, found 272.1412.

Diethyl 2-amino-2-m-tolyethylphosphonate **1c**

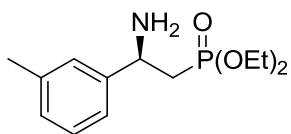

Colorless oil; 86% ee;  $[\alpha]_D^{20} = -2.4$  ( $c = 1$ ,  $\text{CH}_2\text{Cl}_2$ ); The enantiomeric excess was determined by HPLC analysis of the corresponding benzamide, Chiralpak OD-H column, hexane: isopropanol = 90:10; flow rate = 1.0 mL/min; UV detection at 210 nm;  $t_R = 9.5$  min (minor), 16.8 min (major).  $^1\text{H}$  NMR (400 MHz,  $\text{CDCl}_3$ )  $\delta = 7.27$ -7.18 (m, 3H), 7.09-7.07 (m, 1H), 4.41-4.35 (m, 1H), 4.13-4.05 (m, 4H), 2.35 (s, 3H), 2.18-2.09 (m, 4H), 1.31 (t,  $J = 7.2$  Hz, 3H);  $^{13}\text{C}$  NMR (101 MHz,  $\text{CDCl}_3$ )  $\delta = 145.3$  (d,  $J = 16.2$  Hz), 138.3, 128.6, 128.2, 126.8, 123.2, 61.7 (t,  $J = 7.1$  Hz), 51.1 (d,  $J = 2.0$  Hz), 35.9 (d,  $J = 136.4$  Hz), 21.5, 16.5 (d,  $J = 6.1$  Hz);  $^{31}\text{P}$  NMR (161.7 MHz,  $\text{CDCl}_3$ )  $\delta = 29.4$ . ESI-HRMS Calculated for  $\text{C}_{13}\text{H}_{23}\text{NO}_3\text{P}^+$  ( $[\text{M}+\text{H}]^+$ ): 272.1416, found 272.1411.

Diethyl 2-amino-2-(4-methoxyphenyl)ethylphosphonate **1d**

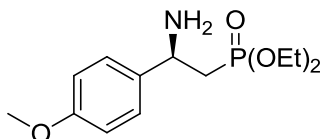

Colorless oil; 86% ee;  $[\alpha]_D^{20} = 6.0$  ( $c = 1$ ,  $\text{CH}_2\text{Cl}_2$ ); The enantiomeric excess was determined by HPLC analysis of the corresponding benzamide, Chiralpak OD-H column, hexane: isopropanol = 80:20; flow rate = 1.0 mL/min; UV detection at 210 nm;  $t_R = 8.0$  min (minor), 13.4 min (major).  $^1\text{H}$  NMR (400 MHz,  $\text{CDCl}_3$ )  $\delta = 7.31$  (d,  $J = 8.4$  Hz, 2H), 6.88 (d,  $J = 8.8$  Hz, 2H), 5.09-5.04 (m, 1H), 4.16-4.07 (m, 4H), 3.8 (s, 1H), 2.25-2.14 (m, 3H), 1.36-1.29 (m, 6H);  $^{13}\text{C}$  NMR (101 MHz,  $\text{CDCl}_3$ )  $\delta = 129.4$ , 127.5, 127.2, 113.9, 74.0, 72.1, 61.1 (d,  $J = 5.1$  Hz), 55.4, 16.5 (d,  $J = 7.1$  Hz);  $^{31}\text{P}$  NMR (161.7 MHz,  $\text{CDCl}_3$ )  $\delta = 26.3$ . ESI-HRMS Calculated for  $\text{C}_{13}\text{H}_{23}\text{NO}_4\text{P}^+$  ( $[\text{M}+\text{H}]^+$ ): 288.1365, found 288.1360.

Diethyl 2-amino-2-(3-methoxyphenyl)ethylphosphonate **1e**

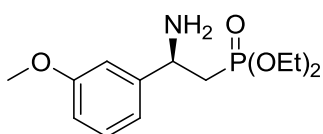

Colorless oil; 85% ee;  $[\alpha]_D^{20} = -3.7$  ( $c = 1$ ,  $\text{CH}_2\text{Cl}_2$ ); The enantiomeric excess was determined

by HPLC analysis of the corresponding benzamide, Chiralpak OD-H column, hexane: isopropanol = 85:15; flow rate = 1.0 mL/min; UV detection at 210 nm;  $t_R$  = 10.1 min (minor), 21.0 min (major).  $^1\text{H}$  NMR (400 MHz,  $\text{CDCl}_3$ )  $\delta$  = 7.27-7.23 (m, 1H), 6.96-6.95 (m, 2H), 6.82-6.79 (m, 1H), 4.42-4.36 (m, 1H), 4.14-4.06 (m, 4H), 3.82 (s, 3H), 2.17-1.98 (m, 4H), 1.34-1.30 (m, 6H);  $^{13}\text{C}$  NMR (101 MHz,  $\text{CDCl}_3$ )  $\delta$  = 159.8, 147.2 (d,  $J$  = 16.2 Hz), 129.7, 118.4, 113.0, 111.6, 61.8 (t,  $J$  = 6.1 Hz), 55.3, 51.2 (d,  $J$  = 4.0 Hz), 36.0 (d,  $J$  = 137.4 Hz), 16.5 (d,  $J$  = 6.1 Hz);  $^{31}\text{P}$  NMR (161.7 MHz,  $\text{CDCl}_3$ )  $\delta$  = 29.3. ESI-HRMS Calculated for  $\text{C}_{13}\text{H}_{23}\text{NO}_4\text{P}^+$  ( $[\text{M}+\text{H}]^+$ ): 288.1365, found 288.1359.

Diethyl 2-amino-2-(4-fluorophenyl)ethylphosphonate **1f**

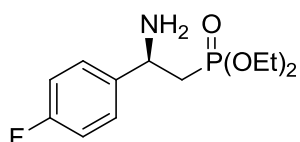

Colorless oil; 80% ee;  $[\alpha]_{\text{D}}^{20}$  = -3.1 ( $c$  = 1,  $\text{CH}_2\text{Cl}_2$ ); The enantiomeric excess was determined by HPLC analysis of the corresponding benzamide, Chiralpak OD-H column, hexane: isopropanol = 90:10; flow rate = 1.0 mL/min; UV detection at 210 nm;  $t_R$  = 10.6 min (minor), 16.8 min (major).  $^1\text{H}$  NMR (400 MHz,  $\text{CDCl}_3$ )  $\delta$  = 7.38-7.35 (m, 2H), 7.04-7.00 (m, 2H), 4.44-4.38 (m, 1H), 4.16-4.04 (m, 4H), 2.19-2.04 (m, 4H), 1.33-1.29 (m, 6H);  $^{13}\text{C}$  NMR (101 MHz,  $\text{CDCl}_3$ )  $\delta$  = 162.0 (d,  $J$  = 246.4 Hz), 127.8 (d,  $J$  = 8.1 Hz), 127.2 (d,  $J$  = 8.1 Hz), 115.4 (d,  $J$  = 21.2 Hz), 61.8 (t,  $J$  = 6.1 Hz), 50.6 (d,  $J$  = 4.0 Hz), 36.0 (d,  $J$  = 138.4 Hz), 16.4 (d,  $J$  = 4.0 Hz);  $^{31}\text{P}$  NMR (161.7 MHz,  $\text{CDCl}_3$ )  $\delta$  = 28.9. ESI-HRMS Calculated for  $\text{C}_{12}\text{H}_{20}\text{FNO}_3\text{P}^+$  ( $[\text{M}+\text{H}]^+$ ): 276.1165, found 276.1162.

Diethyl 2-amino-2-(3-chlorophenyl)ethylphosphonate **1g**

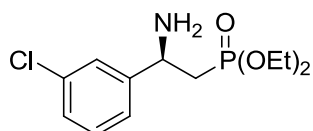

Yellow oil; 85% ee;  $[\alpha]_{\text{D}}^{20}$  = -3.6 ( $c$  = 1,  $\text{CH}_2\text{Cl}_2$ ); The enantiomeric excess was determined by HPLC analysis of the corresponding benzamide, Chiralpak OD-H column, hexane: isopropanol = 90:10; flow rate = 1.0 mL/min; UV detection at 210 nm;  $t_R$  = 10.3 min (minor), 16.2 min (major).  $^1\text{H}$  NMR (400 MHz,  $\text{CDCl}_3$ )  $\delta$  = 7.41 (s, 1H), 7.28-7.24 (m, 3H), 4.43-4.37 (m, 1H),

4.13-4.04 (m, 4H), 2.15-2.08 (m, 4H), 1.33-1.29 (m, 6H);  $^{13}\text{C}$  NMR (101 MHz,  $\text{CDCl}_3$ )  $\delta$  = 147.3 (d,  $J$  = 16.2 Hz), 134.4, 130.0, 127.6, 126.5, 124.5, 61.9 (t,  $J$  = 6.1 Hz), 50.9 (d,  $J$  = 4.0 Hz), 35.8 (d,  $J$  = 138.4 Hz), 16.4 (q,  $J$  = 4.0 Hz);  $^{31}\text{P}$  NMR (161.7 MHz,  $\text{CDCl}_3$ )  $\delta$  = 28.6. ESI-HRMS Calculated for  $\text{C}_{12}\text{H}_{20}\text{ClNO}_3\text{P}^+$  ( $[\text{M}+\text{H}]^+$ ): 292.0869, found 292.0868.

#### Diethyl 2-amino-2-(3-bromophenyl)ethylphosphonate **1h**

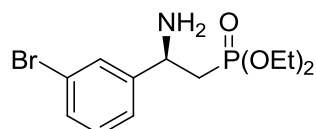

Yellow oil; 84% ee;  $[\alpha]_{\text{D}}^{20}$  = -3.6 ( $c$  = 1,  $\text{CH}_2\text{Cl}_2$ ); The enantiomeric excess was determined by HPLC analysis of the corresponding benzamide, Chiralpak OD-H column, hexane: isopropanol = 80:20; flow rate = 1.0 mL/min; UV detection at 210 nm;  $t_{\text{R}}$  = 5.9 min (minor), 7.9 min (major).  $^1\text{H}$  NMR (400 MHz,  $\text{CDCl}_3$ )  $\delta$  = 7.56 (s, 1H), 7.39 (d,  $J$  = 8.0 Hz, 1H), 7.32 (d,  $J$  = 8.0 Hz, 1H), 7.21 (dd,  $J$  = 8.0 Hz, 8.0 Hz, 1H), 4.41-4.35 (m, 1H), 4.13-4.05 (m, 4H), 2.14-2.00 (m, 4H), 1.33-1.29 (m, 6H);  $^{13}\text{C}$  NMR (101 MHz,  $\text{CDCl}_3$ )  $\delta$  = 147.7 (d,  $J$  = 16.2 Hz), 130.6, 130.3, 129.4, 124.9, 122.7, 61.8 (t,  $J$  = 6.1 Hz), 50.8 (d,  $J$  = 4.0 Hz), 35.9 (d,  $J$  = 138.4 Hz), 16.4 (q,  $J$  = 4.0 Hz);  $^{31}\text{P}$  NMR (161.7 MHz,  $\text{CDCl}_3$ )  $\delta$  = 28.6. ESI-HRMS Calculated for  $\text{C}_{12}\text{H}_{20}\text{BrNO}_3\text{P}^+$  ( $[\text{M}+\text{H}]^+$ ): 336.0364, found 336.0354.

#### Reference

[1] R. Kadyrov, J. Holz, B. Schöffner, O. Zayas, J. Almena, A. Börner, *Tetrahedron: Asymmetry* 2008, 19, 1189-1192.

## IV. NMR spectra

Diethyl 2-amino-2-phenylethylphosphonate **1a**

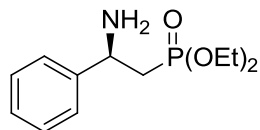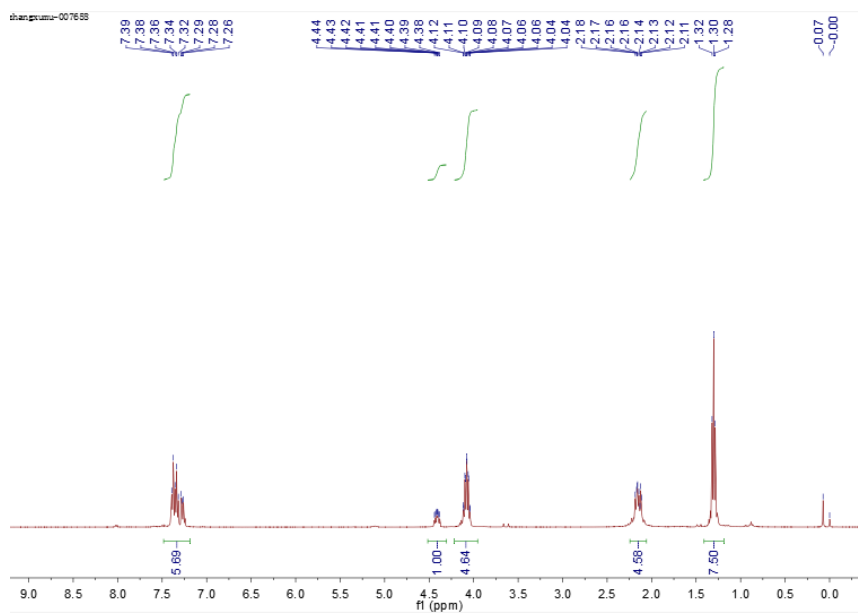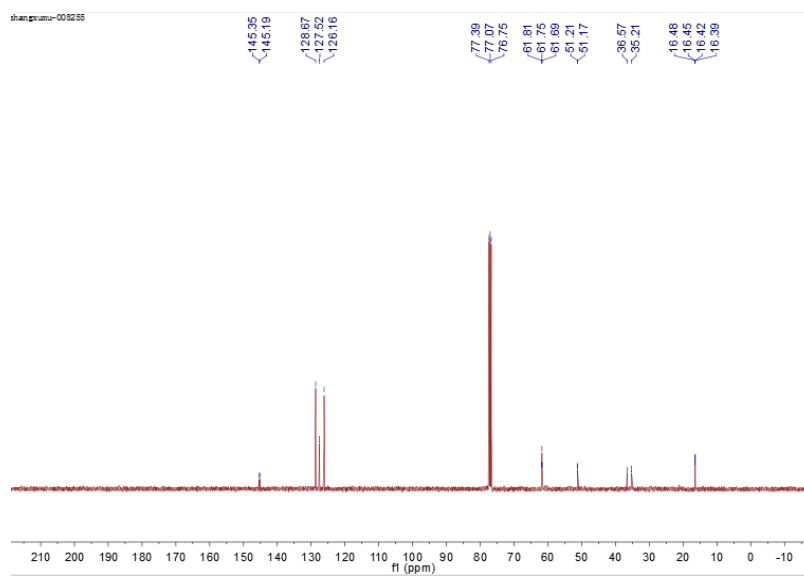

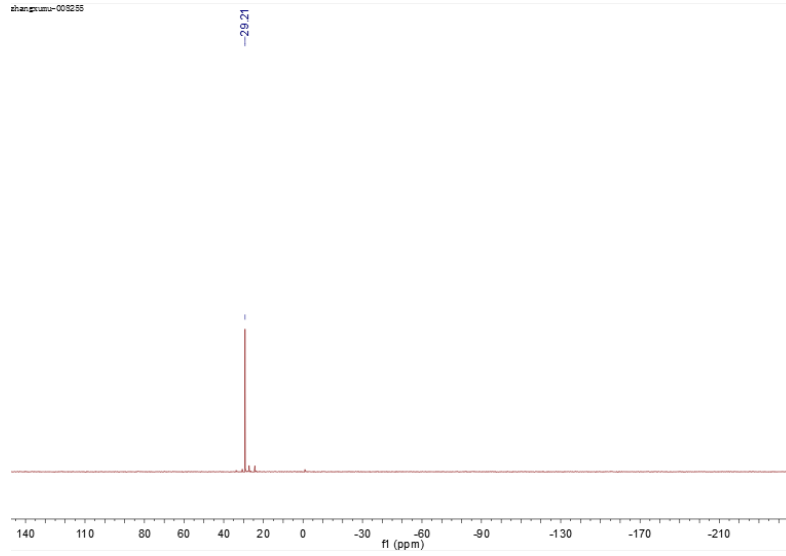

Diethyl 2-amino-2-p-tolyethylphosphonate **1b**

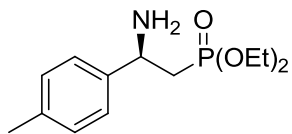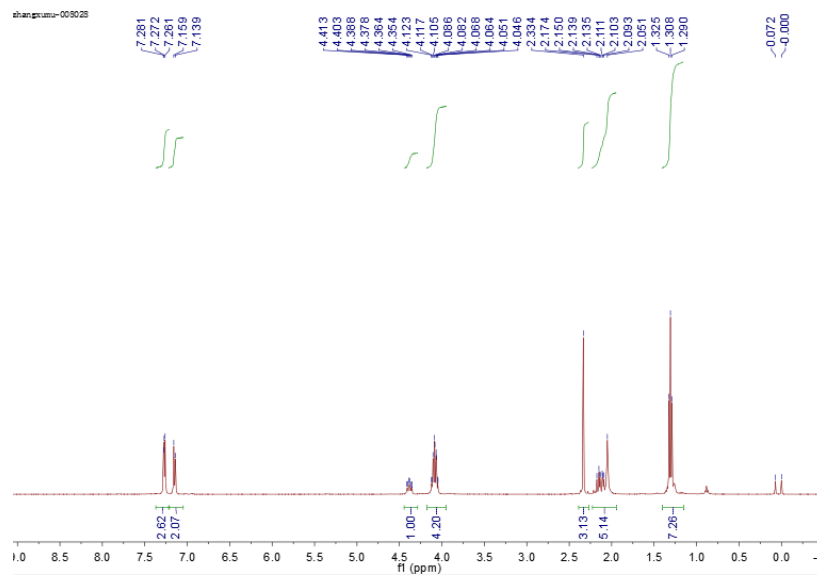



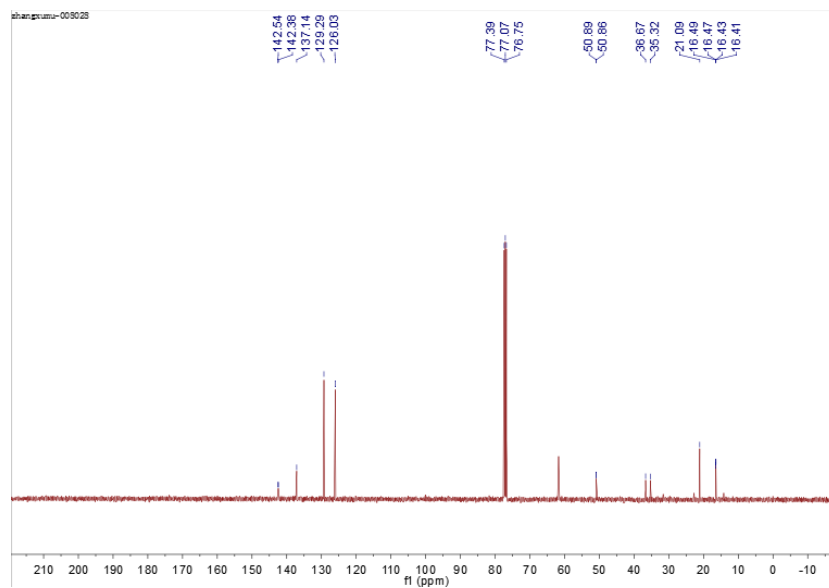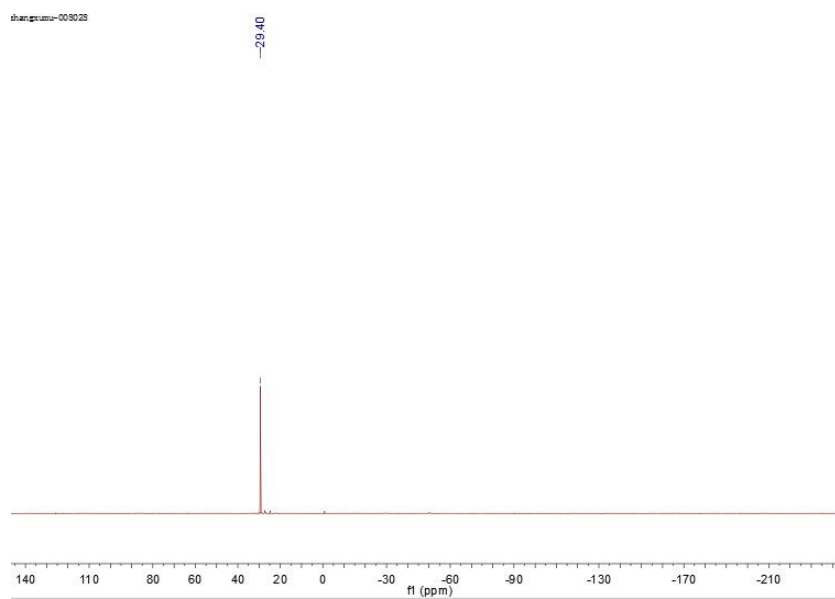

Diethyl 2-amino-2-m-tolyethylphosphonate **1c**

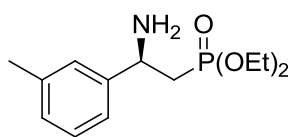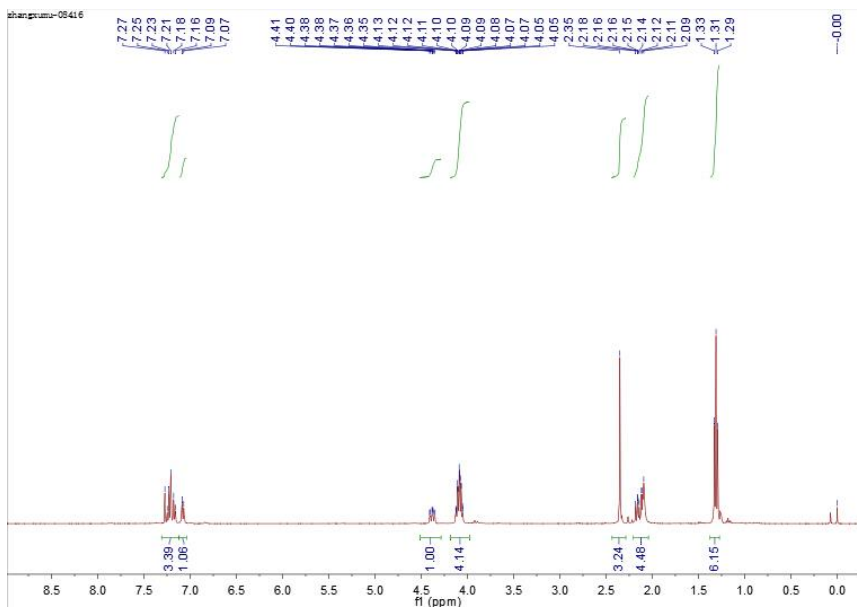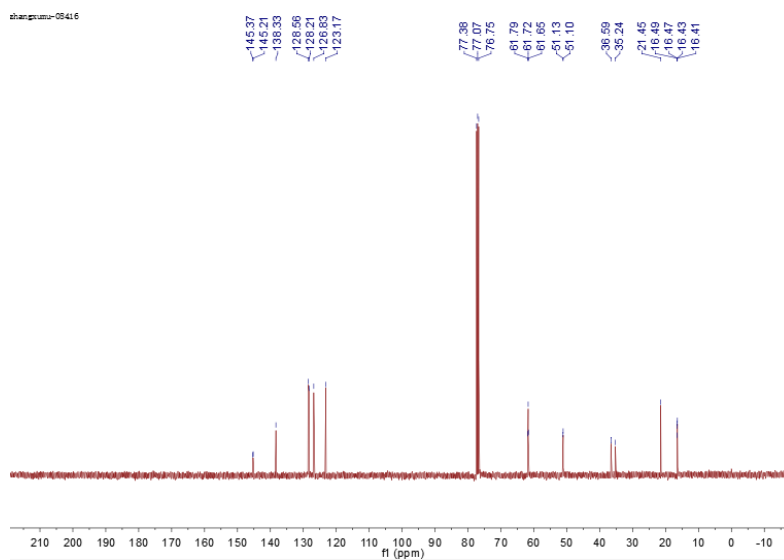

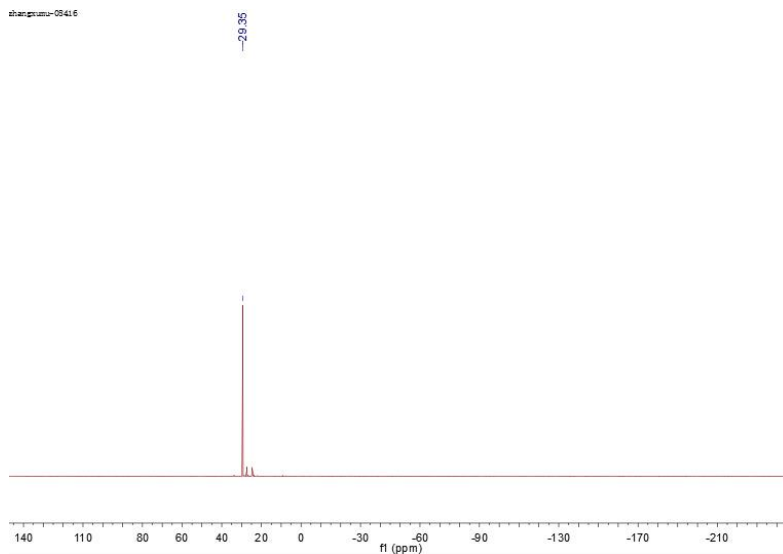

Diethyl 2-amino-2-(4-methoxyphenyl)ethylphosphonate **1d**

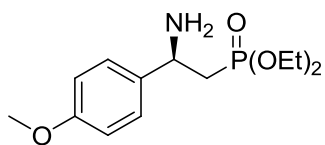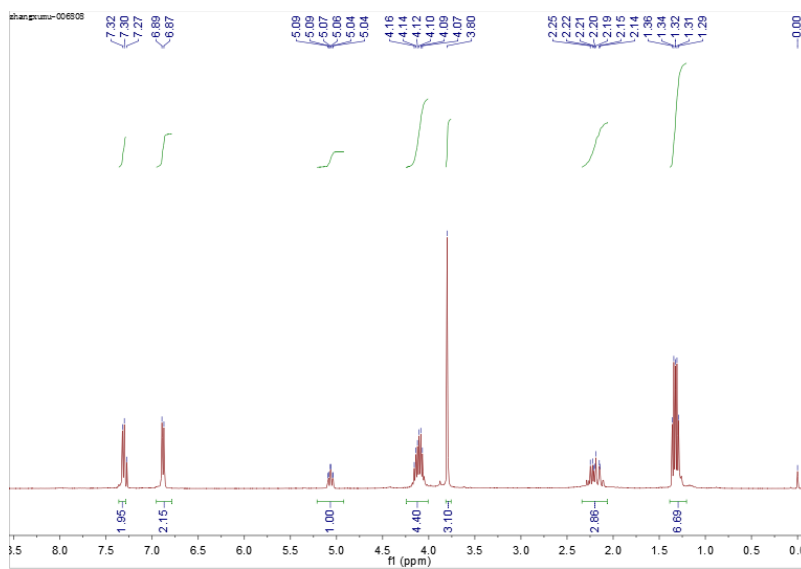

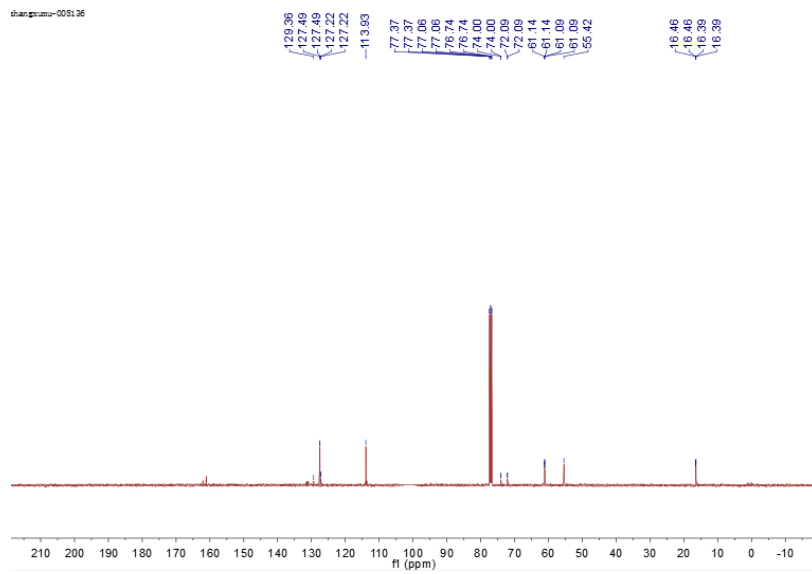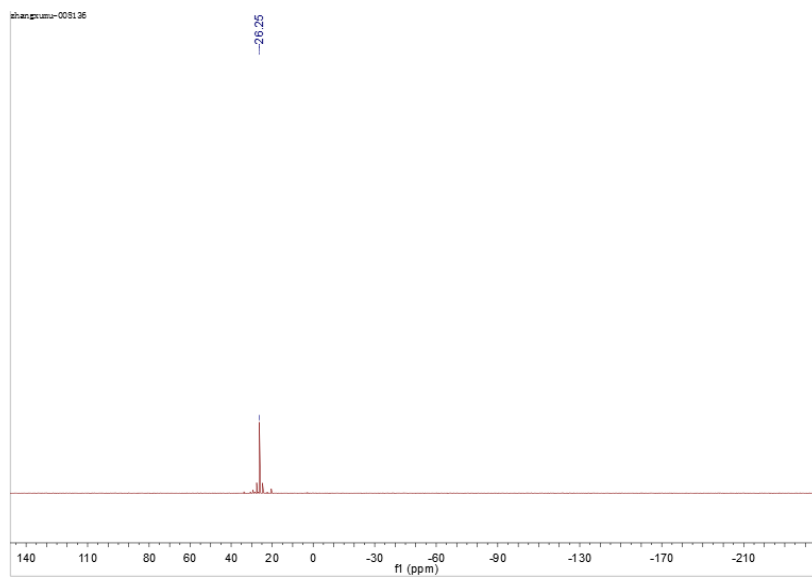

Diethyl 2-amino-2-(3-methoxyphenyl)ethylphosphonate **1e**

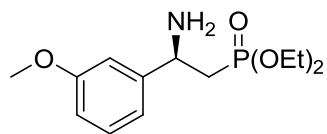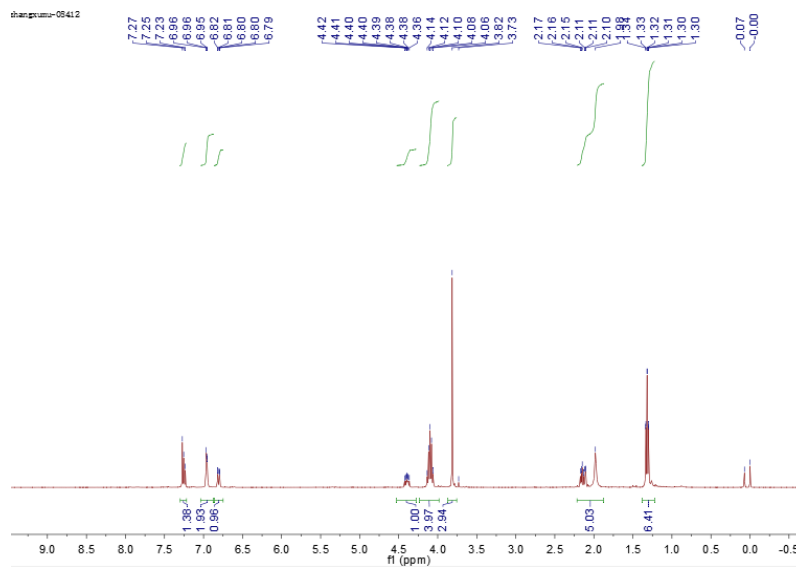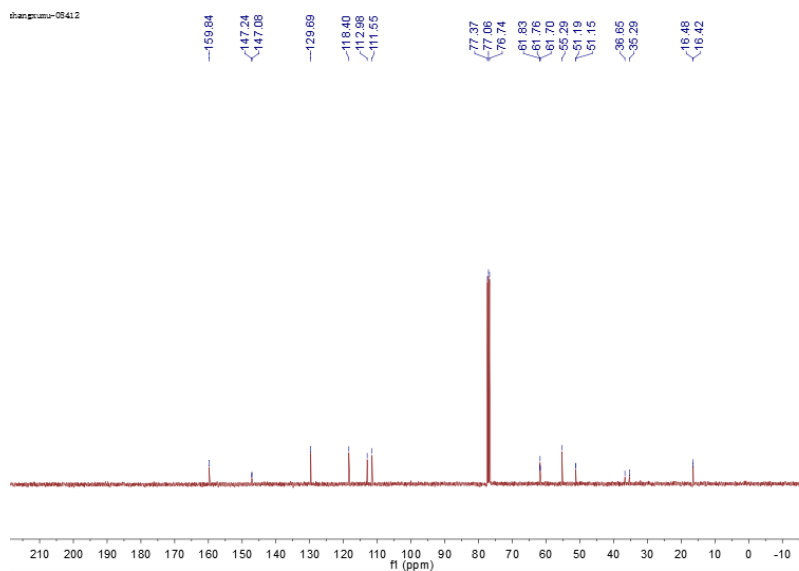

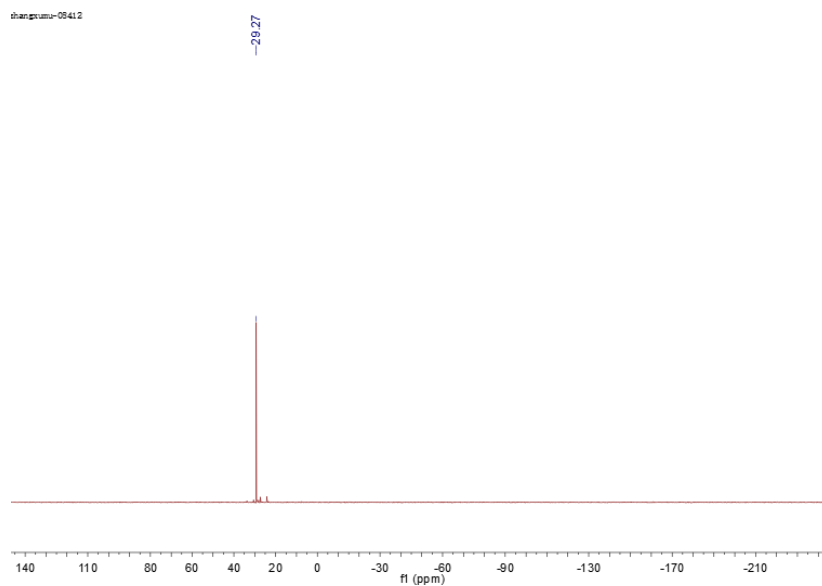

Diethyl 2-amino-2-(4-fluorophenyl)ethylphosphonate **1f**

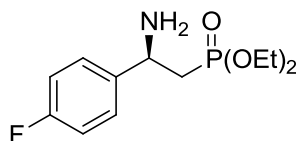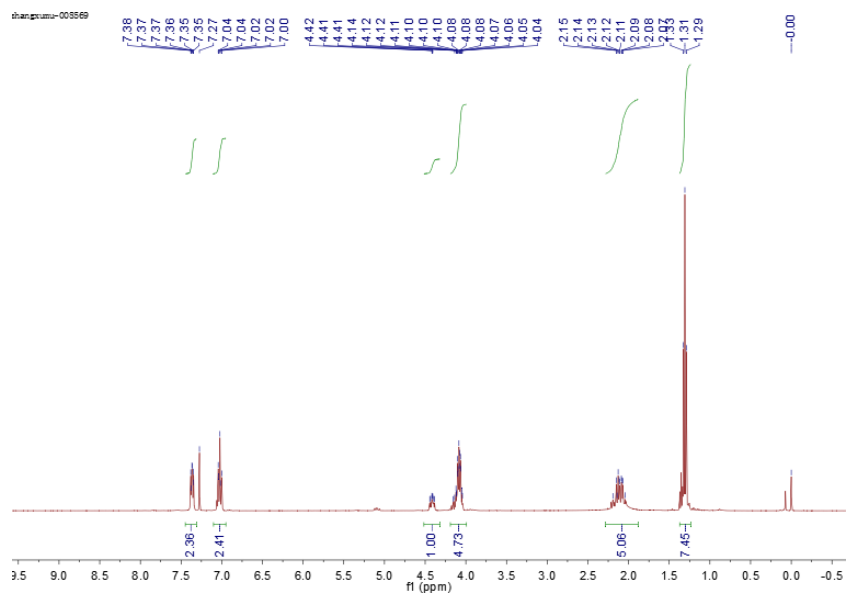

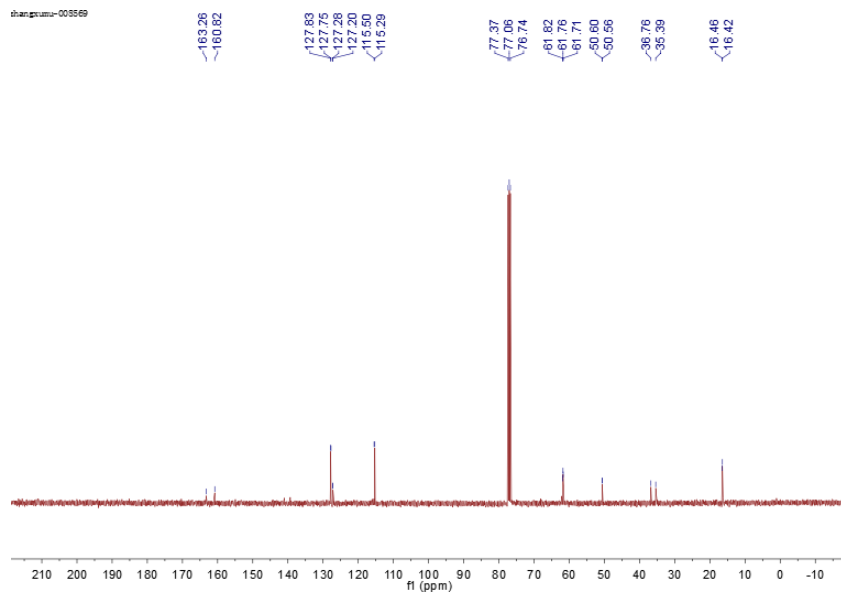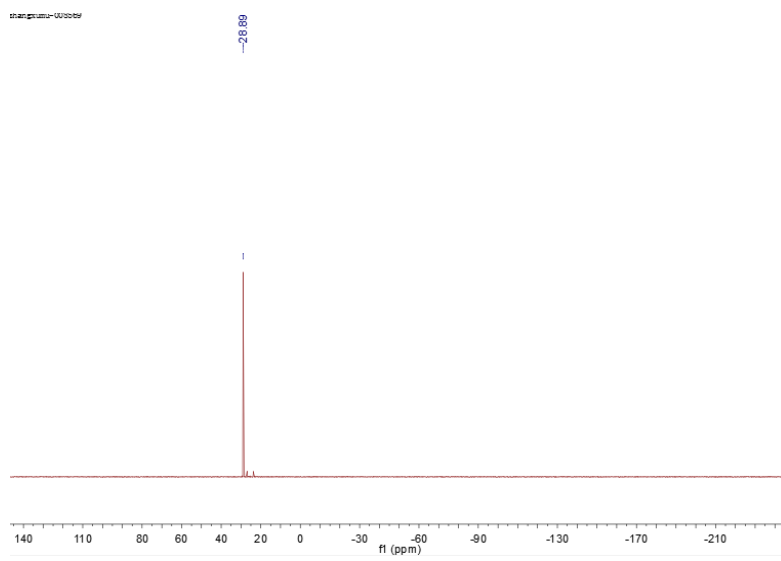

Diethyl 2-amino-2-(3-chlorophenyl)ethylphosphonate **1g**

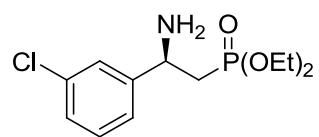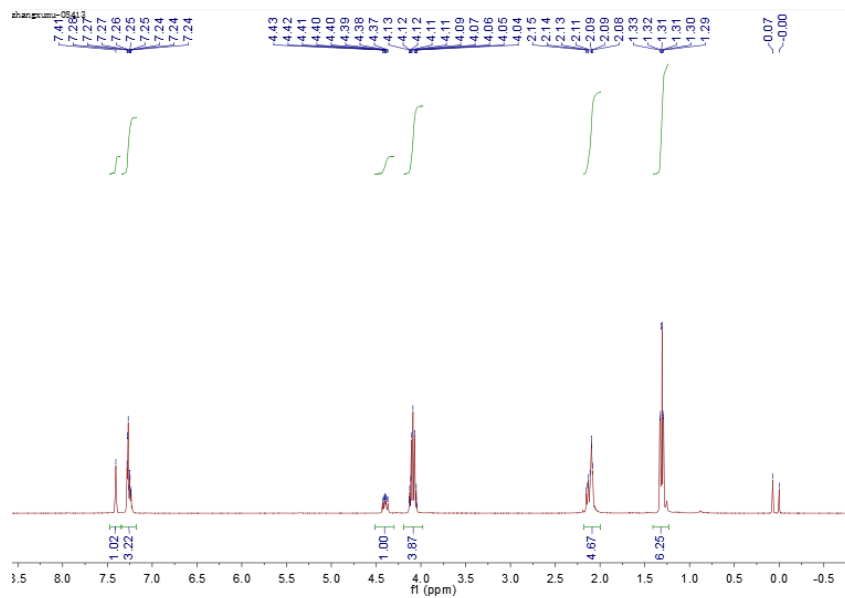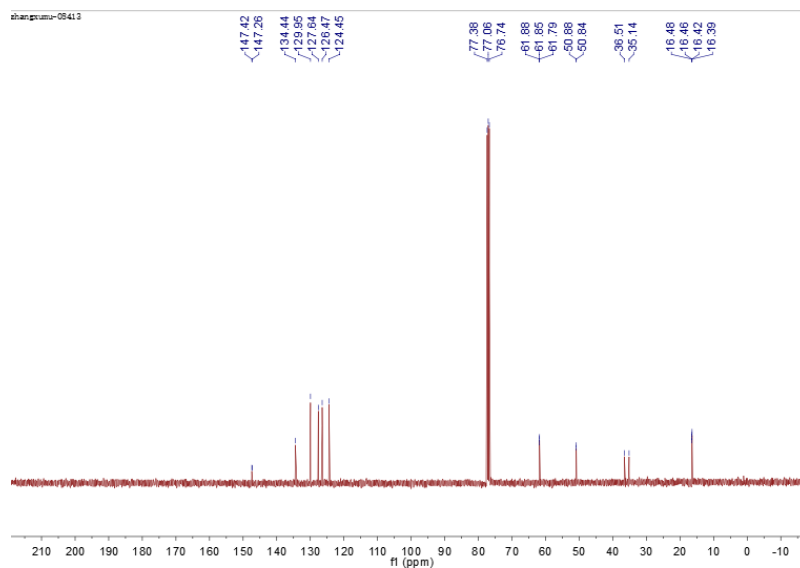



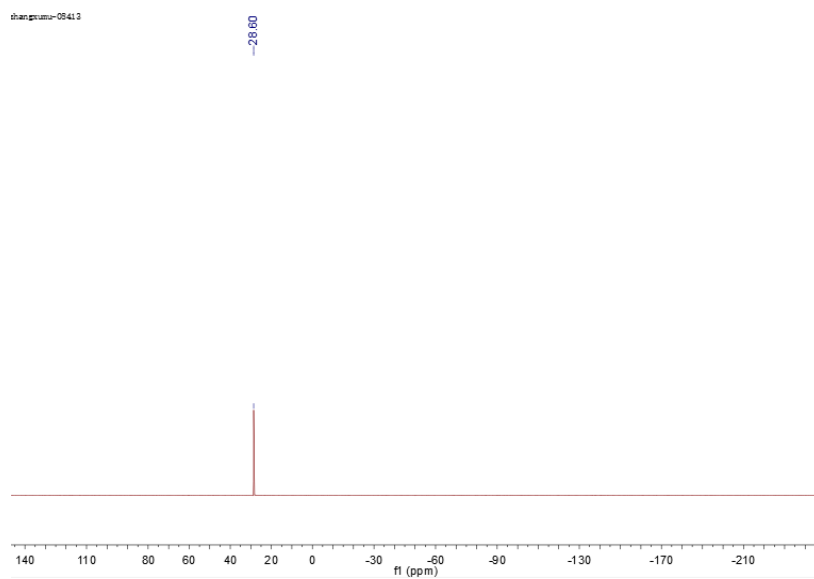

Diethyl 2-amino-2-(3-bromophenyl)ethylphosphonate **1h**

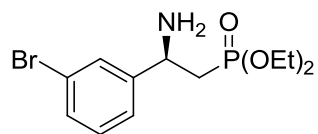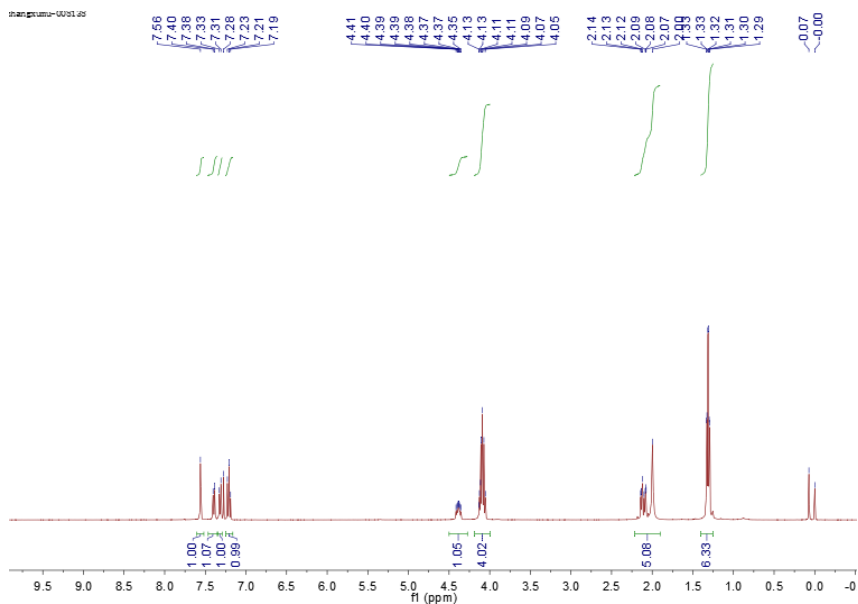

shangpin-008138

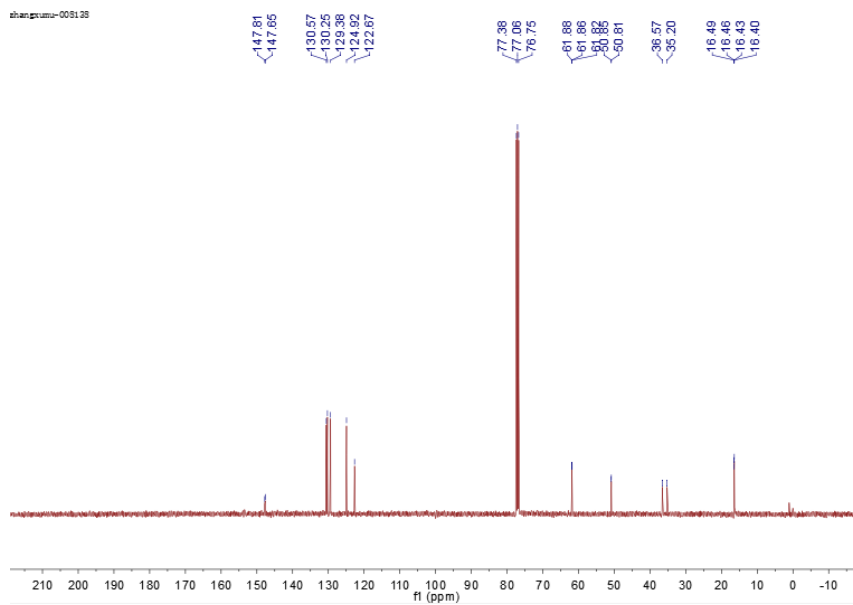

shangpin-008138

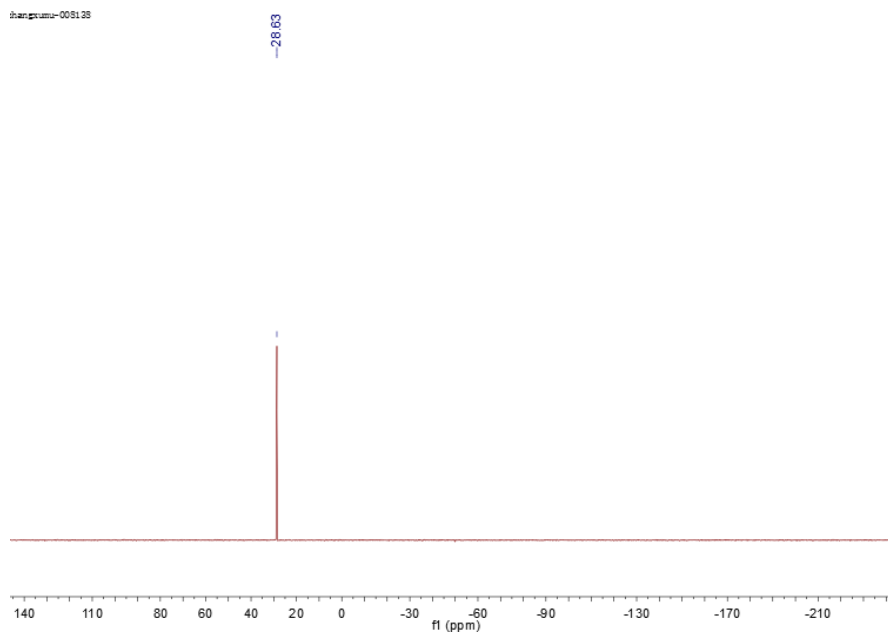

## V. HPLC spectra

Data File E:\DATA\ZM\ZM-3-110\ZM-3-110 2015-12-22 18-37-24\005-0701.D  
 Sample Name: zm-3-70

```

=====
Acq. Operator   : SYSTEM                      Seq. Line :    7
Acq. Instrument : 1260HPLC-DAD                Location  : Vial 5
Injection Date  : 12/22/2015 8:23:59 PM      Inj       :    1
                                           Inj Volume: 5.000 µl
Acq. Method     : E:\DATA\ZM\ZM-3-110\ZM-3-110 2015-12-22 18-37-24\DAD-OD(1-2)-90-10-1ML-
                254NM-25MIN.M
Last changed    : 12/22/2015 6:52:41 PM by SYSTEM
Analysis Method : E:\DATA\ZM\ZM-3-110\ZM-3-110 2015-12-22 18-37-24\DAD-OD(1-2)-90-10-1ML-
                254NM-25MIN.M (Sequence Method)
Last changed    : 3/9/2016 10:02:09 PM by SYSTEM
                (modified after loading)
Additional Info : Peak(s) manually integrated
  
```

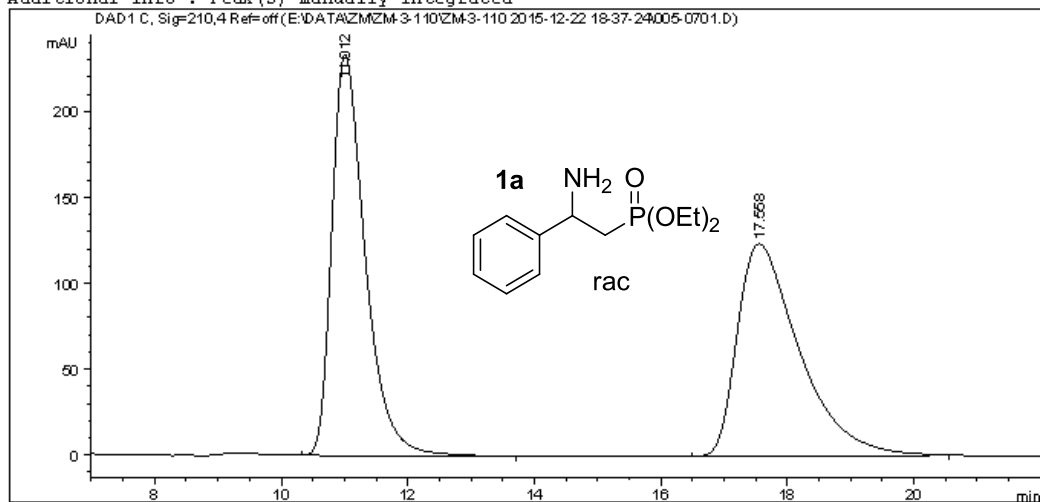

### Area Percent Report

```

Sorted By      : Signal
Multiplier     : 1.0000
Dilution       : 1.0000
Do not use Multiplier & Dilution Factor with ISTDs
  
```

Signal 1: DAD1 C, Sig=210,4 Ref=off

| Peak # | RetTime [min] | Type | Width [min] | Area [mAU*s] | Height [mAU] | Area %  |
|--------|---------------|------|-------------|--------------|--------------|---------|
| 1      | 11.012        | BB   | 0.5593      | 8559.85449   | 233.71532    | 50.3907 |
| 2      | 17.558        | BB   | 0.9671      | 8427.10449   | 123.65019    | 49.6093 |

Totals : 1.69870e4 357.36551

\*\*\* End of Report \*\*\*



Data File E:\DATA\ZM\ZM-3-110\ZM-3-110 2015-12-22 18-37-24\003-0401.D  
Sample Name: zm-3-87-2

```
=====
Acq. Operator   : SYSTEM                               Seq. Line :    4
Acq. Instrument : 1260HPLC-DAD                       Location  : Vial 3
Injection Date  : 12/22/2015 7:31:02 PM              Inj       :    1
                                                    Inj Volume: 5.000 µl
Acq. Method     : E:\DATA\ZM\ZM-3-110\ZM-3-110 2015-12-22 18-37-24\DAD-ODH(1-2)-80-20-1ML-
                254NM-20MIN.M
Last changed    : 12/22/2015 6:37:25 PM by SYSTEM
Analysis Method : E:\DATA\ZM\ZM-3-110\ZM-3-110 2015-12-22 18-37-24\DAD-ODH(1-2)-80-20-1ML-
                254NM-20MIN.M (Sequence Method)
Last changed    : 3/9/2016 10:06:09 PM by SYSTEM
                (modified after loading)
Additional Info : Peak(s) manually integrated
=====
```

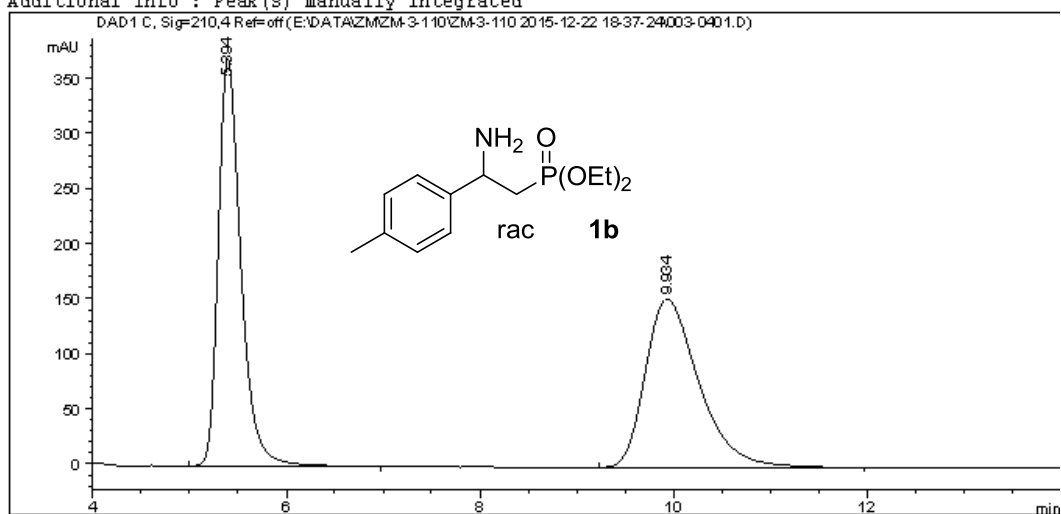

=====  
Area Percent Report  
=====

Sorted By : Signal  
Multiplier : 1.0000  
Dilution : 1.0000  
Do not use Multiplier & Dilution Factor with ISTDs

Signal 1: DAD1 C, Sig=210,4 Ref=off

| Peak # | RetTime [min] | Type | Width [min] | Area [mAU*s] | Height [mAU] | Area %  |
|--------|---------------|------|-------------|--------------|--------------|---------|
| 1      | 5.394         | BB   | 0.2466      | 5981.14404   | 369.98022    | 50.4152 |
| 2      | 9.934         | BB   | 0.5810      | 5882.63086   | 152.86333    | 49.5848 |

Totals : 1.18638e4 522.84355

=====  
\*\*\* End of Report \*\*\*

Data File E:\DATA\ZM\ZM-3-110\ZM-3-110 2015-12-22 18-37-24\004-0501.D  
 Sample Name: zm-3-110-4

```

=====
Acq. Operator   : SYSTEM                      Seq. Line :    5
Acq. Instrument : 1260HPLC-DAD                Location  : Vial 4
Injection Date  : 12/22/2015 7:51:57 PM      Inj       :    1
                                           Inj Volume: 5.000 µl
Acq. Method     : E:\DATA\ZM\ZM-3-110\ZM-3-110 2015-12-22 18-37-24\DAD-ODH(1-2)-80-20-1ML-
254NM-20MIN.M
Last changed    : 12/22/2015 6:37:25 PM by SYSTEM
Analysis Method : E:\DATA\ZM\ZM-3-110\ZM-3-110 2015-12-22 18-37-24\DAD-ODH(1-2)-80-20-1ML-
254NM-20MIN.M (Sequence Method)
Last changed    : 3/9/2016 10:06:09 PM by SYSTEM
                (modified after loading)
Additional Info : Peak(s) manually integrated
  
```

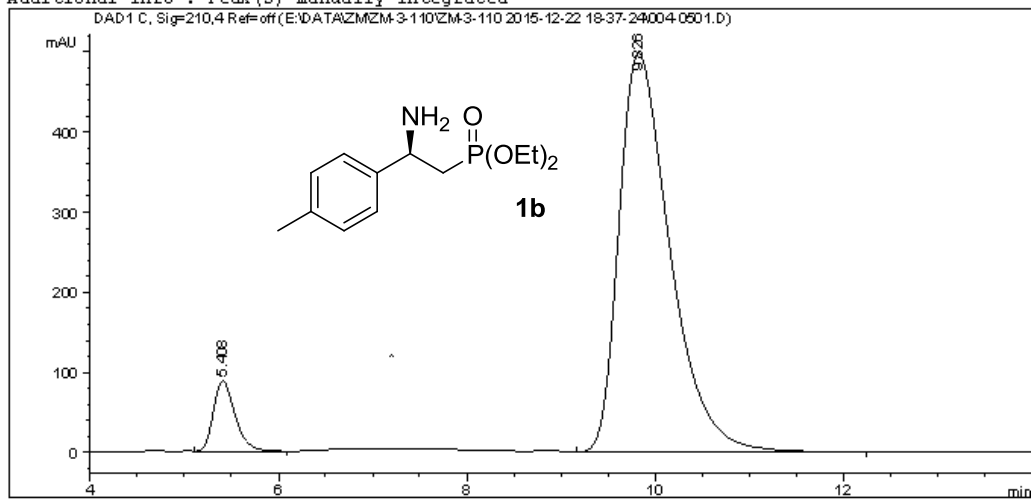

=====  
 Area Percent Report  
 =====

```

Sorted By      :      Signal
Multiplier     :      1.0000
Dilution      :      1.0000
Do not use Multiplier & Dilution Factor with ISTDs
  
```

Signal 1: DAD1 C, Sig=210,4 Ref=off

| Peak # | RetTime [min] | Type | Width [min] | Area [mAU*s] | Height [mAU] | Area %  |
|--------|---------------|------|-------------|--------------|--------------|---------|
| 1      | 5.408         | VB   | 0.2459      | 1418.32788   | 88.04224     | 7.0314  |
| 2      | 9.826         | BB   | 0.5740      | 1.87531e4    | 497.26898    | 92.9686 |

Totals :                    2.01714e4   585.31123

=====  
 \*\*\* End of Report \*\*\*

Data File E:\DATA\ZM\ZM-3-110\ZM-3-110 2015-12-22 18-37-24\008-1001.D  
 Sample Name: zm-3-110-6

```

=====
Acq. Operator   : SYSTEM                      Seq. Line :   10
Acq. Instrument : 1260HPLC-DAD                Location  : Vial 8
Injection Date  : 12/22/2015 9:41:41 PM      Inj       :    1
                                           Inj Volume: 5.000 µl
Acq. Method     : E:\DATA\ZM\ZM-3-110\ZM-3-110 2015-12-22 18-37-24\DAD-OD(1-2)-90-10-1ML-
                254NM-25MIN.M
Last changed    : 12/22/2015 6:52:41 PM by SYSTEM
Analysis Method : E:\DATA\ZM\ZM-3-110\ZM-3-110 2015-12-22 18-37-24\DAD-OD(1-2)-90-10-1ML-
                254NM-25MIN.M (Sequence Method)
Last changed    : 3/9/2016 10:20:57 PM by SYSTEM
                (modified after loading)
Additional Info : Peak(s) manually integrated
  
```

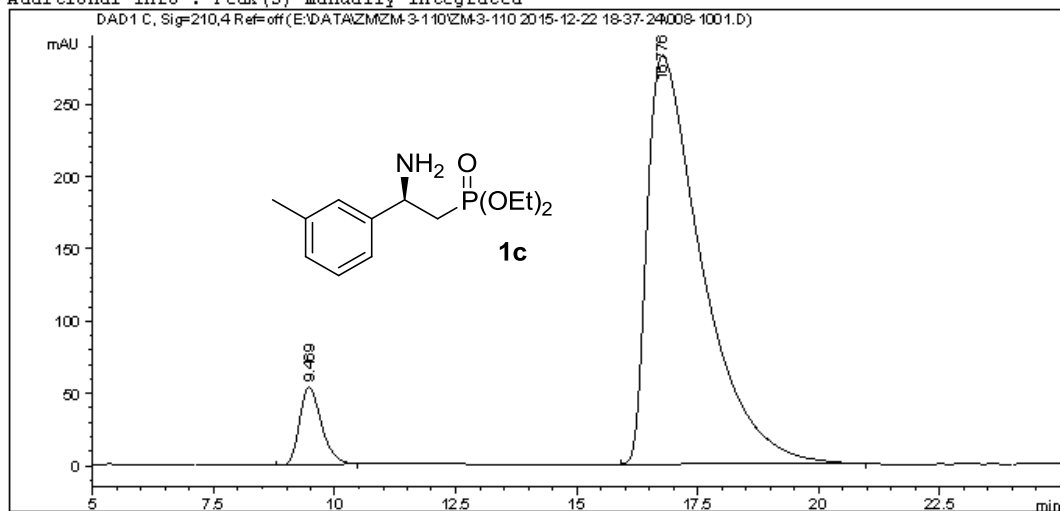

=====  
 Area Percent Report  
 =====

```

Sorted By       :      Signal
Multiplier      :      1.0000
Dilution       :      1.0000
Do not use Multiplier & Dilution Factor with ISTDs
  
```

Signal 1: DAD1 C, Sig=210,4 Ref=off

| Peak # | RetTime [min] | Type | Width [min] | Area [mAU*s] | Height [mAU] | Area %  |
|--------|---------------|------|-------------|--------------|--------------|---------|
| 1      | 9.469         | BB   | 0.4840      | 1700.77222   | 53.91608     | 7.1188  |
| 2      | 16.776        | BB   | 1.0736      | 2.21905e4    | 282.75879    | 92.8812 |

Totals :                    2.38913e4    336.67487

=====  
 \*\*\* End of Report \*\*\*





Data File E:\DATA\ZM\ZM-3-110\ZM-3-110 2015-12-22 18-37-24\002-0301.D  
 Sample Name: zm-3-110-8

```

=====
Acq. Operator   : SYSTEM                      Seq. Line :    3
Acq. Instrument : 1260HPLC-DAD                Location  : Vial 2
Injection Date  : 12/22/2015 7:10:09 PM      Inj       :    1
                                           Inj Volume: 5.000 µl
Acq. Method     : E:\DATA\ZM\ZM-3-110\ZM-3-110 2015-12-22 18-37-24\DAD-ODH(1-2)-80-20-1ML-
254NM-20MIN.M
Last changed    : 12/22/2015 6:37:25 PM by SYSTEM
Analysis Method : E:\DATA\ZM\ZM-3-110\ZM-3-110 2015-12-22 18-37-24\DAD-ODH(1-2)-80-20-1ML-
254NM-20MIN.M (Sequence Method)
Last changed    : 3/9/2016 10:28:11 PM by SYSTEM
                 (modified after loading)
Additional Info : Peak(s) manually integrated
  
```

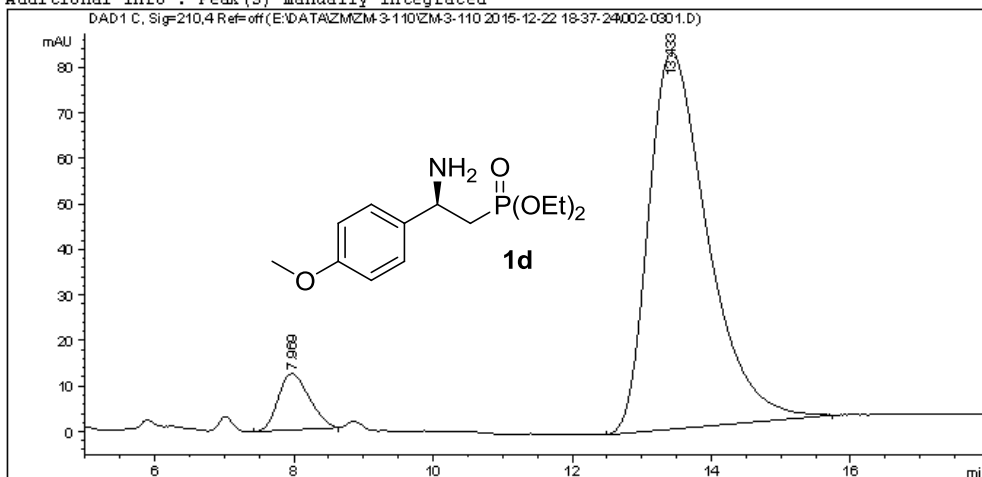

=====  
 Area Percent Report  
 =====

```

Sorted By      :      Signal
Multiplier     :      1.0000
Dilution       :      1.0000
Do not use Multiplier & Dilution Factor with ISTDs
  
```

Signal 1: DAD1 C, Sig=210,4 Ref=off

| Peak # | RetTime [min] | Type | Width [min] | Area [mAU*s] | Height [mAU] | Area %  |
|--------|---------------|------|-------------|--------------|--------------|---------|
| 1      | 7.969         | BB   | 0.4018      | 382.85391    | 12.34669     | 7.2622  |
| 2      | 13.433        | BB   | 0.8388      | 4889.02344   | 82.81379     | 92.7378 |

Totals :                    5271.87735    95.16048

=====  
 \*\*\* End of Report \*\*\*





Data File E:\DATA\ZM\ZM-3-104\ZM-3-104 2015-12-11 19-58-00\079-1101.D  
Sample Name: ZM-3-103-2

```
=====
Acq. Operator   : SYSTEM                               Seq. Line : 11
Acq. Instrument : 1260HPLC-DAD                       Location  : Vial 79
Injection Date  : 12/11/2015 11:08:24 PM             Inj       : 1
                                                    Inj Volume: 5.000 µl
Acq. Method     : E:\DATA\ZM\ZM-3-104\ZM-3-104 2015-12-11 19-58-00\DAD-OD(1-2)-90-10-1ML-
                254NM-25MIN.M
Last changed    : 12/11/2015 8:19:08 PM by SYSTEM
Analysis Method : E:\DATA\ZM\ZM-3-104\ZM-3-104 2015-12-11 19-58-00\DAD-OD(1-2)-90-10-1ML-
                254NM-25MIN.M (Sequence Method)
Last changed    : 3/9/2016 10:34:22 PM by SYSTEM
                (modified after loading)
Additional Info : Peak(s) manually integrated
=====
```

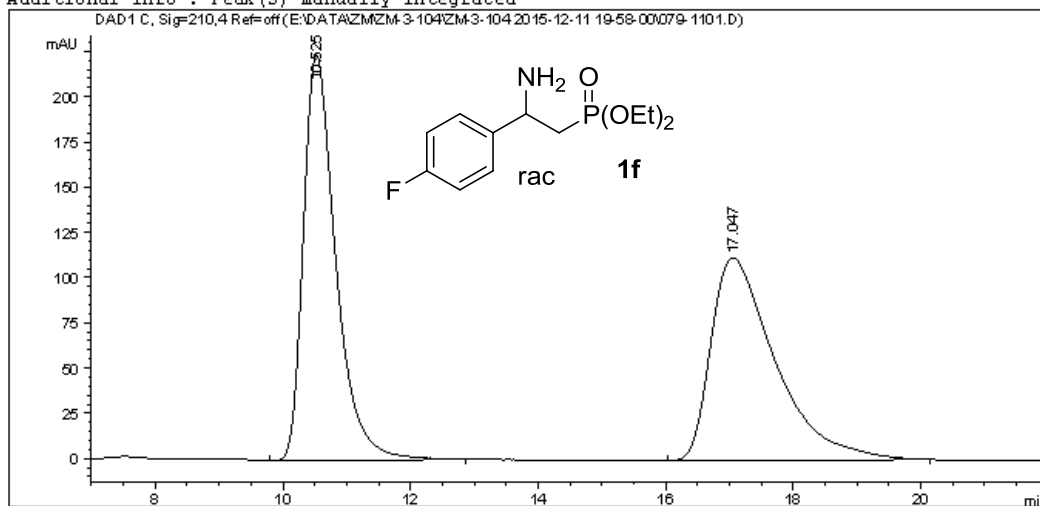

```
=====
Area Percent Report
=====
```

```
Sorted By      : Signal
Multiplier     : 1.0000
Dilution       : 1.0000
Do not use Multiplier & Dilution Factor with ISTDs
```

Signal 1: DAD1 C, Sig=210,4 Ref=off

| Peak # | RetTime [min] | Type | Width [min] | Area [mAU*s] | Height [mAU] | Area %  |
|--------|---------------|------|-------------|--------------|--------------|---------|
| 1      | 10.525        | BB   | 0.5357      | 7905.39795   | 224.02859    | 50.3227 |
| 2      | 17.047        | BB   | 1.0191      | 7804.01709   | 111.98026    | 49.6773 |

```
Totals :                1.57094e4  336.00886
```

```
=====
*** End of Report ***
=====
```

Data File E:\DATA\ZM\ZM-3-104\ZM-3-104 2015-12-11 19-58-00\080-1201.D  
Sample Name: ZM-3-104-2

```
=====
Acq. Operator   : SYSTEM                               Seq. Line : 12
Acq. Instrument : 1260HPLC-DAD                       Location  : Vial 80
Injection Date  : 12/11/2015 11:34:20 PM             Inj       : 1
                                                    Inj Volume: 5.000 µl
Acq. Method     : E:\DATA\ZM\ZM-3-104\ZM-3-104 2015-12-11 19-58-00\DAD-OD(1-2)-90-10-1ML-
                254NM-25MIN.M
Last changed    : 12/11/2015 8:19:08 PM by SYSTEM
Analysis Method : E:\DATA\ZM\ZM-3-104\ZM-3-104 2015-12-11 19-58-00\DAD-OD(1-2)-90-10-1ML-
                254NM-25MIN.M (Sequence Method)
Last changed    : 3/9/2016 10:34:22 PM by SYSTEM
                (modified after loading)
Additional Info : Peak(s) manually integrated
=====
```

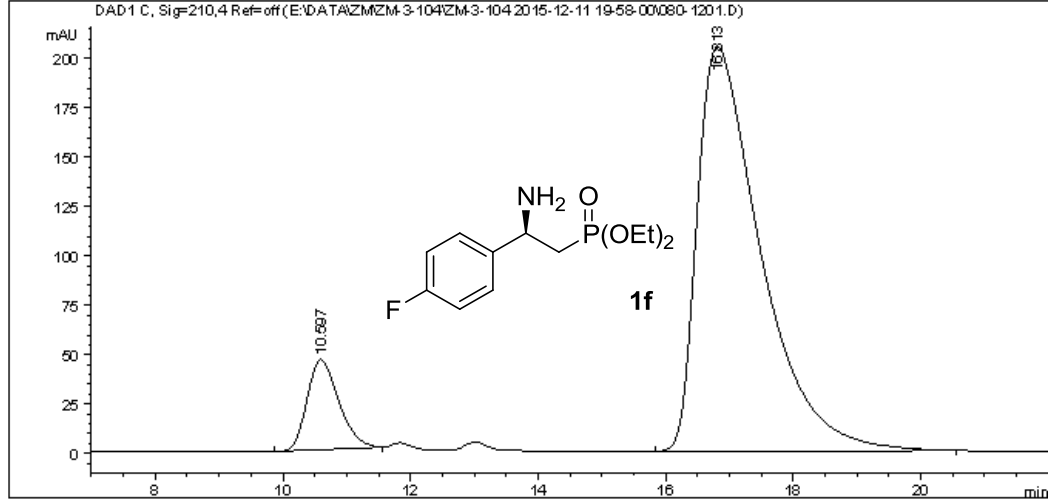

=====  
Area Percent Report  
=====

Sorted By : Signal  
Multiplier : 1.0000  
Dilution : 1.0000  
Do not use Multiplier & Dilution Factor with ISTDs

Signal 1: DAD1 C, Sig=210,4 Ref=off

| Peak # | RetTime [min] | Type | Width [min] | Area [mAU*s] | Height [mAU] | Area %  |
|--------|---------------|------|-------------|--------------|--------------|---------|
| 1      | 10.597        | BB   | 0.5266      | 1572.52502   | 45.57267     | 10.0066 |
| 2      | 16.813        | BB   | 1.0202      | 1.41423e4    | 205.16388    | 89.9934 |

Totals : 1.57148e4 250.73655

=====  
\*\*\* End of Report \*\*\*

Data File E:\DATA\ZM\ZM-3-117\ZM-3-117A 2015-12-30 17-11-01\003-0701.D  
 Sample Name: zm-3-115-2

```

=====
Acq. Operator   : SYSTEM                      Seq. Line :    7
Acq. Instrument : 1260HPLC-DAD                Location  : Vial 3
Injection Date  : 12/30/2015 7:27:35 PM      Inj       :    1
                                                Inj Volume: 5.000 µl
Acq. Method     : E:\DATA\ZM\ZM-3-117\ZM-3-117A 2015-12-30 17-11-01\DAD-0D(1-2)-90-10-1ML-
                254NM-25MIN.M
Last changed    : 12/30/2015 5:11:02 PM by SYSTEM
Analysis Method : E:\DATA\ZM\ZM-3-117\ZM-3-117A 2015-12-30 17-11-01\DAD-0DH(1-2)-85-15-1ML-
                254NM-30MIN.M (Sequence Method)
Last changed    : 3/9/2016 9:46:37 PM by SYSTEM
                (modified after loading)
Additional Info : Peak(s) manually integrated
  
```

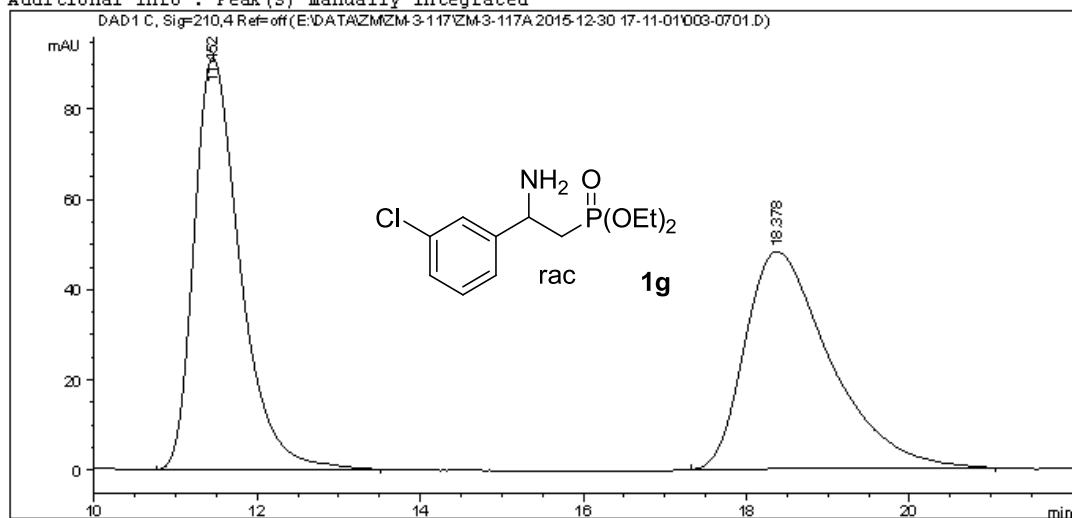

=====  
 Area Percent Report  
 =====

```

Sorted By      : Signal
Multiplier     : 1.0000
Dilution      : 1.0000
Do not use Multiplier & Dilution Factor with ISTDs
  
```

Signal 1: DAD1 C, Sig=210,4 Ref=off

| Peak # | RetTime [min] | Type | Width [min] | Area [mAU*s] | Height [mAU] | Area %  |
|--------|---------------|------|-------------|--------------|--------------|---------|
| 1      | 11.452        | BB   | 0.5909      | 3581.08447   | 91.43313     | 50.6391 |
| 2      | 18.378        | BB   | 0.8841      | 3490.68994   | 48.13045     | 49.3609 |

Totals : 7071.77441 139.56358

=====  
 \*\*\* End of Report \*\*\*

Data File E:\DATA\ZM\ZM-3-117\ZM-3-117A 2015-12-30 17-11-01\004-0801.D  
 Sample Name: zm-3-117-4

```

=====
Acq. Operator   : SYSTEM                      Seq. Line :    8
Acq. Instrument : 1260HPLC-DAD                Location  : Vial 4
Injection Date  : 12/30/2015 7:53:30 PM      Inj       :    1
                                           Inj Volume: 5.000 µl
Acq. Method     : E:\DATA\ZM\ZM-3-117\ZM-3-117A 2015-12-30 17-11-01\DAD-0D(1-2)-90-10-IML-
                254NM-25MIN.M
Last changed    : 12/30/2015 5:11:02 PM by SYSTEM
Analysis Method : E:\DATA\ZM\ZM-3-117\ZM-3-117A 2015-12-30 17-11-01\DAD-0D(1-2)-90-10-IML-
                254NM-25MIN.M (Sequence Method)
Last changed    : 3/9/2016 9:55:50 PM by SYSTEM
                (modified after loading)
Additional Info : Peak(s) manually integrated
  
```

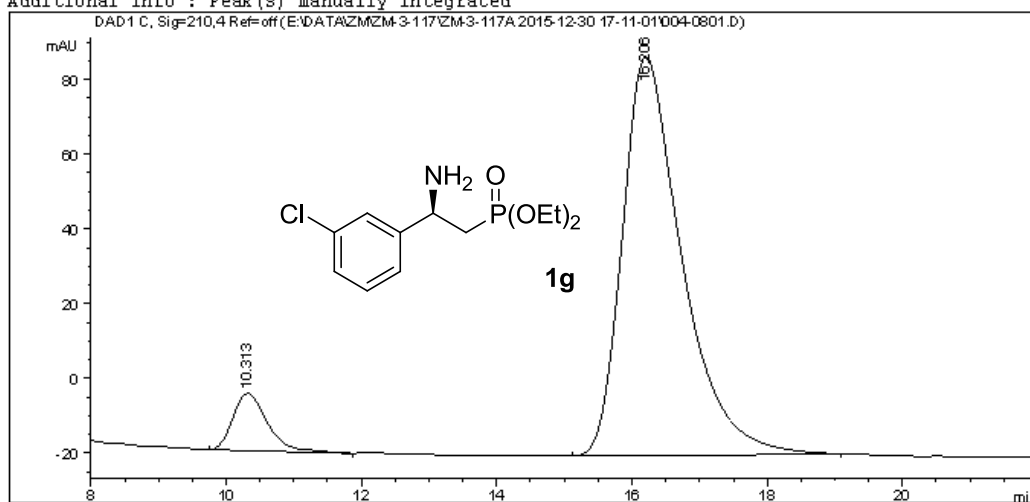

=====  
 Area Percent Report  
 =====

```

Sorted By       :      Signal
Multiplier      :      1.0000
Dilution       :      1.0000
Do not use Multiplier & Dilution Factor with ISTDs
  
```

Signal 1: DAD1 C, Sig=210,4 Ref=off

| Peak # | RetTime [min] | Type | Width [min] | Area [mAU*s] | Height [mAU] | Area %  |
|--------|---------------|------|-------------|--------------|--------------|---------|
| 1      | 10.313        | BB   | 0.4668      | 540.83594    | 15.28706     | 7.6511  |
| 2      | 16.206        | BB   | 0.8555      | 6527.89990   | 106.74691    | 92.3489 |

Totals :                    7068.73584 122.03397

=====  
 \*\*\* End of Report \*\*\*

Data File E:\DATA\ZM\ZM-3-104\ZM-3-104 2015-12-11 19-58-00\071-0201.D  
Sample Name: ZM-3-107-1

```
=====
Acq. Operator   : SYSTEM                      Seq. Line :    2
Acq. Instrument : 1260HPLC-DAD                Location  : Vial 71
Injection Date  : 12/11/2015 8:09:51 PM      Inj       :    1
                                           Inj Volume: 5.000 µl
Acq. Method     : E:\DATA\ZM\ZM-3-104\ZM-3-104 2015-12-11 19-58-00\DAD-ODH(1-2)-80-20-1ML-
                254NM-20MIN.M
Last changed    : 12/11/2015 7:58:01 PM by SYSTEM
Analysis Method : E:\DATA\ZM\ZM-3-104\ZM-3-104 2015-12-11 19-58-00\DAD-ODH(1-2)-80-20-1ML-
                254NM-20MIN.M (Sequence Method)
Last changed    : 3/9/2016 10:30:23 PM by SYSTEM
                (modified after loading)
Additional Info : Peak(s) manually integrated
=====
```

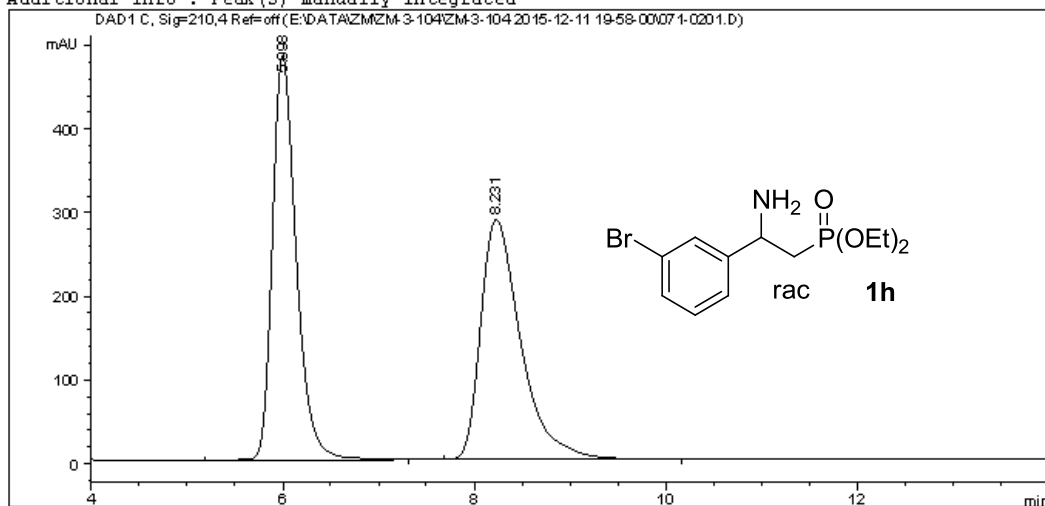

=====  
Area Percent Report  
=====

Sorted By : Signal  
Multiplier : 1.0000  
Dilution : 1.0000  
Do not use Multiplier & Dilution Factor with ISTDs

Signal 1: DAD1 C, Sig=210,4 Ref=off

| Peak # | RetTime [min] | Type | Width [min] | Area [mAU*s] | Height [mAU] | Area %  |
|--------|---------------|------|-------------|--------------|--------------|---------|
| 1      | 5.998         | BB   | 0.2645      | 8412.79590   | 484.59744    | 50.0953 |
| 2      | 8.231         | BB   | 0.4423      | 8380.79590   | 287.33026    | 49.9047 |

Totals : 1.67936e4 771.92770

=====  
\*\*\* End of Report \*\*\*
